# Supplementary material for: Machine learning-aided understanding of the structure–activity relationship: a case study of MoS2 supported metal–nonmetal pairs for the hydrogen evolution reaction
Source: Royal Society of Chemistry journal article supplement (doi:10.1039/d4nr02112f), 2024-01-01
Supplement: d4nr02112f1.pdf [file d4nr02112f1.pdf]

## Supporting Information

# Machine Learning-Aided Understanding of Structure-Activity Relation: A Case Study of MoS<sub>2</sub> Supported Metal-Nonmetal Pair for Hydrogen Evolution Reaction

Anjie Chen,<sup>1</sup> Jinxin Sun,<sup>1</sup> Junming Guan,<sup>1</sup> Yaqi Liu,<sup>1</sup> Ying Han,<sup>1</sup> Wenqi Zhou,<sup>1</sup> Xinli Zhao,<sup>1</sup> Yanbiao Wang,<sup>2\*</sup> Yongjun Liu,<sup>1\*</sup> Xiuyun Zhang,<sup>1,3\*</sup>

<sup>1</sup>College of Physics Science and Technology, Yangzhou University, Yangzhou 225002, China

<sup>2</sup>Department of Fundamental Courses, Wuxi Institute of Technology, Wuxi 214121, China

<sup>3</sup>Key Laboratory of Quantum Materials and Devices of Ministry of Education, School of Physics, Southeast University, Nanjing, 211189, China

E-mail: [wangyb@wxit.edu.cn](mailto:wangyb@wxit.edu.cn); [yjliu@yzu.edu.cn](mailto:yjliu@yzu.edu.cn); [xyzhang@yzu.edu.cn](mailto:xyzhang@yzu.edu.cn)

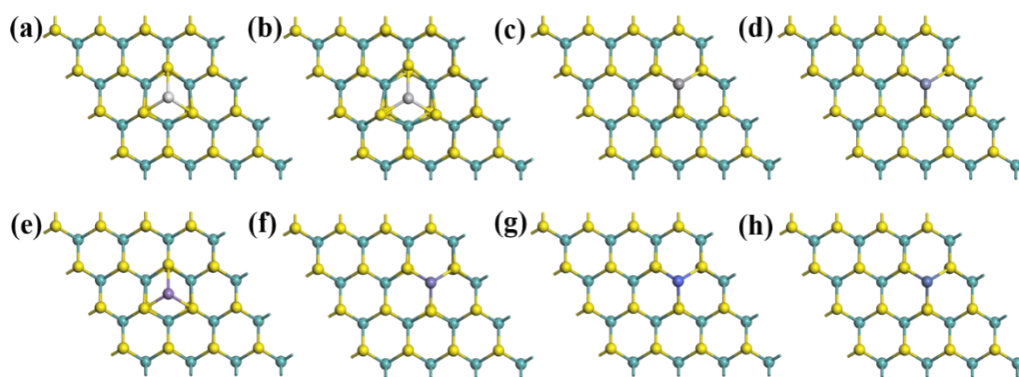

Fig. S1 (a) Sc, (b) Ti, (c) V, (d) Cr, (e) Mn, (f) Fe, (g) Co, and (h) Ni supported on MoS<sub>2</sub> supercell structure optimization diagram.

|                   |                      |                      |                      |                      |                      |                       |                       |                      |
|-------------------|----------------------|----------------------|----------------------|----------------------|----------------------|-----------------------|-----------------------|----------------------|
| <b>Sc simples</b> | BSc@MoS <sub>2</sub> | CSc@MoS <sub>2</sub> | NSc@MoS <sub>2</sub> | OSc@MoS <sub>2</sub> | PSc@MoS <sub>2</sub> | SeSc@MoS <sub>2</sub> | TeSc@MoS <sub>2</sub> | SSc@MoS <sub>2</sub> |
| Top view          |                      |                      |                      |                      |                      |                       |                       |                      |
| <b>Ti simples</b> | BTi@MoS <sub>2</sub> | CTi@MoS <sub>2</sub> | NTi@MoS <sub>2</sub> | OTi@MoS <sub>2</sub> | PTi@MoS <sub>2</sub> | SeTi@MoS <sub>2</sub> | TeTi@MoS <sub>2</sub> | STi@MoS <sub>2</sub> |
| Top view          |                      |                      |                      |                      |                      |                       |                       |                      |
| <b>V simples</b>  | BV@MoS <sub>2</sub>  | CV@MoS <sub>2</sub>  | NV@MoS <sub>2</sub>  | OV@MoS <sub>2</sub>  | PV@MoS <sub>2</sub>  | SeV@MoS <sub>2</sub>  | TeV@MoS <sub>2</sub>  | SV@MoS <sub>2</sub>  |
| Top view          |                      |                      |                      |                      |                      |                       |                       |                      |
| <b>Cr simples</b> | BCr@MoS <sub>2</sub> | CCr@MoS <sub>2</sub> | NCr@MoS <sub>2</sub> | OCr@MoS <sub>2</sub> | PCr@MoS <sub>2</sub> | SeCr@MoS <sub>2</sub> | TeCr@MoS <sub>2</sub> | SCr@MoS <sub>2</sub> |
| Top view          |                      |                      |                      |                      |                      |                       |                       |                      |
| <b>Mn simples</b> | BMn@MoS <sub>2</sub> | CMn@MoS <sub>2</sub> | NMn@MoS <sub>2</sub> | OMn@MoS <sub>2</sub> | PMn@MoS <sub>2</sub> | SeMn@MoS <sub>2</sub> | TeMn@MoS <sub>2</sub> | SMn@MoS <sub>2</sub> |
| Top view          |                      |                      |                      |                      |                      |                       |                       |                      |
| <b>Fe simples</b> | BFe@MoS <sub>2</sub> | CFe@MoS <sub>2</sub> | NFe@MoS <sub>2</sub> | OFe@MoS <sub>2</sub> | PFe@MoS <sub>2</sub> | SeFe@MoS <sub>2</sub> | TeFe@MoS <sub>2</sub> | SFe@MoS <sub>2</sub> |
| Top view          |                      |                      |                      |                      |                      |                       |                       |                      |
| <b>Co simples</b> | BCo@MoS <sub>2</sub> | CCo@MoS <sub>2</sub> | NCo@MoS <sub>2</sub> | OCo@MoS <sub>2</sub> | PCo@MoS <sub>2</sub> | SeCo@MoS <sub>2</sub> | TeCo@MoS <sub>2</sub> | SCo@MoS <sub>2</sub> |
| Top view          |                      |                      |                      |                      |                      |                       |                       |                      |
| <b>Ni simples</b> | BNi@MoS <sub>2</sub> | CNi@MoS <sub>2</sub> | NNi@MoS <sub>2</sub> | ONi@MoS <sub>2</sub> | PNi@MoS <sub>2</sub> | SeNi@MoS <sub>2</sub> | TeNi@MoS <sub>2</sub> | SNi@MoS <sub>2</sub> |
| Top view          |                      |                      |                      |                      |                      |                       |                       |                      |

Fig. S2 Structure optimization of XTM@MoS<sub>2</sub> supercell.

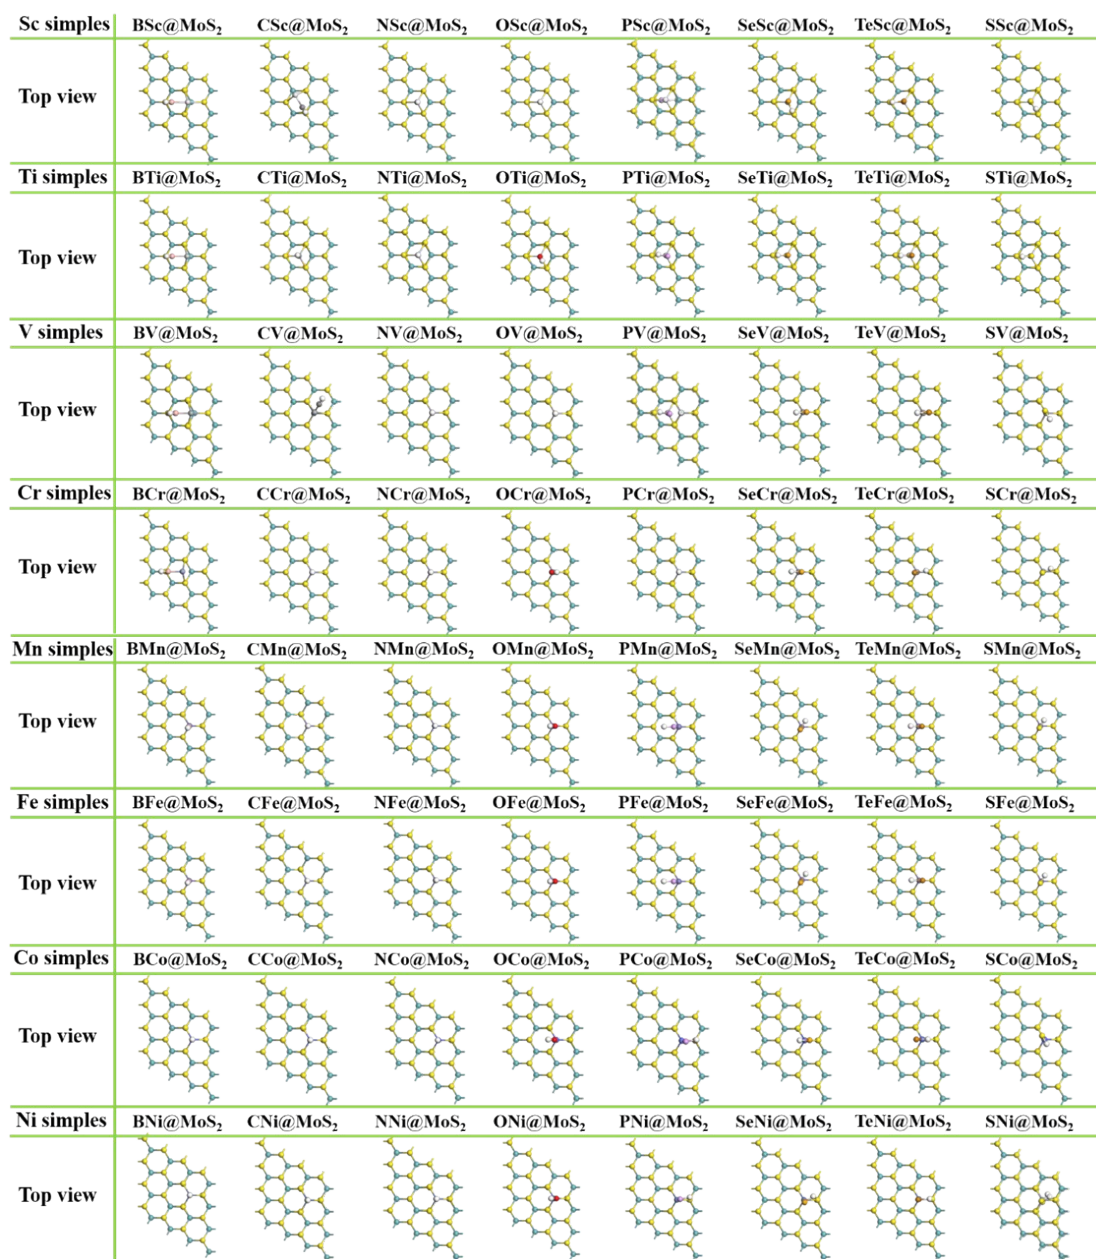

Fig. S3 The optimized structure of XTM@MoS<sub>2</sub> supercell after adsorbing H.

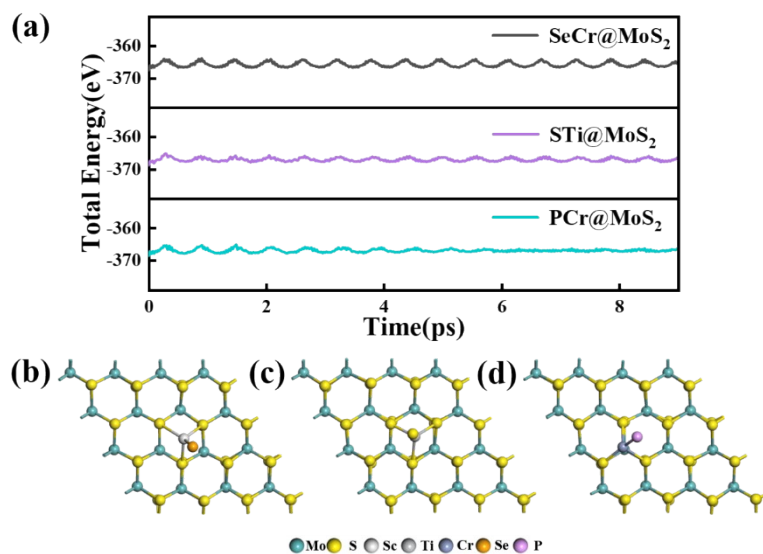

Fig. S4 (a) The variations of energy during the 9 ps AIMD simulation. (b-d) The final structures of SeSc@MoS<sub>2</sub>, STi@MoS<sub>2</sub>, and PCr@MoS<sub>2</sub> at 300 K after the simulation.

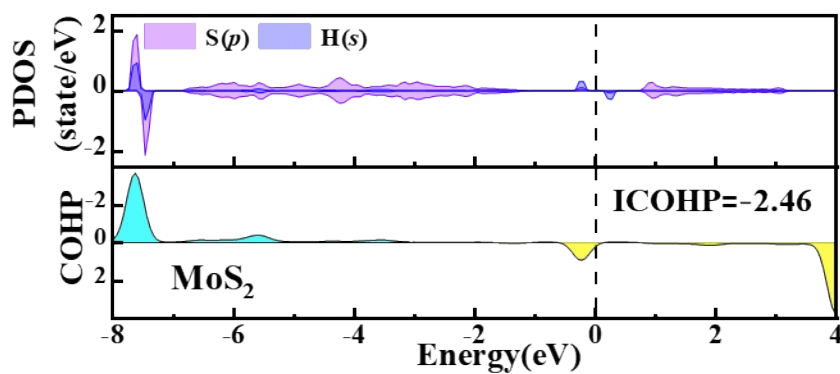

Fig. S5 The Partial density of states (PDOS), crystal orbital Hamilton populations (COHPs), and integrated COHP (ICOHP) for H adsorption on MoS<sub>2</sub>.

Table S1 The binding energies ( $E_{b-TM}$ ) of these TM@MoS<sub>2</sub>s (TM=Sc-Ni).

| SYS | T <sub>S</sub> (eV) | T <sub>M</sub> (eV) | H <sub>S</sub> (eV) | SYS | T <sub>S</sub> (eV) | T <sub>M</sub> (eV) | H <sub>S</sub> (eV) |
|-----|---------------------|---------------------|---------------------|-----|---------------------|---------------------|---------------------|
| Sc  | -2.316              | -2.350              | <b>-2.584</b>       | Mn  | -0.346              | -1.193              | <b>-1.220</b>       |
| Ti  |                     | -2.799              | <b>-2.859</b>       | Fe  | -0.724              | -2.351              | <b>-2.255</b>       |
| V   |                     | <b>-2.527</b>       | -2.038              | Co  | -1.435              | <b>-3.078</b>       | -2.759              |
| Cr  | -0.607              | <b>-1.204</b>       | -0.857              | Ni  | -2.092              | <b>-3.778</b>       | -3.467              |
